# Supplementary material
Source: Springer Nature journal article supplement (https://www.springermedizin.de/resource/supplementary/12914_2012_235_MOESM3_ESM.pdf/9537222)

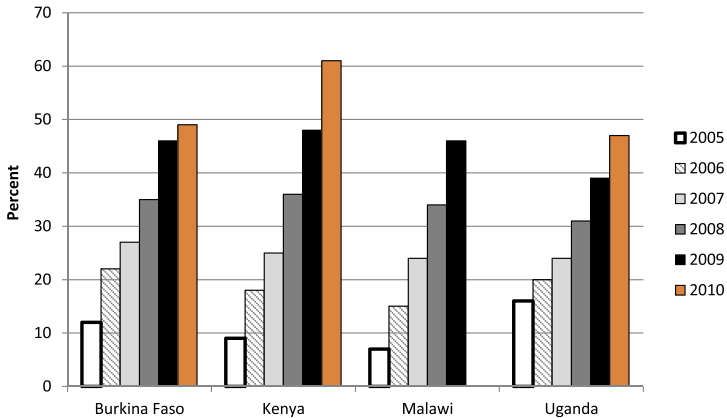

Supplement: MOESM3 [file 9537222]
